# Supplementary material
Source: HighWire-hosted journal article supplement (https://bmjopenrespres.bmj.com/content/10/1/e001928)
Supplement: inline-supplementary-material-1 [file inline-supplementary-material-1.pdf]

## SUPPLEMENTARY MATERIAL

Supplementary Table S1: ICD codes

| Condition                                                              | ICD-9          | ICD-10                     |
|------------------------------------------------------------------------|----------------|----------------------------|
| Asthma                                                                 | 493            | J45                        |
| Asthma-like conditions                                                 |                |                            |
| Atopic dermatitis                                                      | 691, 692, 693  | L20-30                     |
| Allergic rhinitis                                                      | 477            | J30                        |
| Urticaria                                                              | 708            | L50                        |
| Cystic fibrosis                                                        | 277            | E84                        |
| <i>Lower respiratory illness<br/>(combination of conditions below)</i> |                |                            |
| Bronchiolitis                                                          | 466.1*, 516.34 | J21*, J84.115              |
| Pneumonia                                                              | 480-486*, 770* | J10-18*, P23*,             |
| Respiratory interstitial virus                                         | 079.6          | J12.1, J20.5, J21.0, B97.4 |

Supplementary Table S2: ATC codes antibiotics

| ATC code | Description                                                                                                          |
|----------|----------------------------------------------------------------------------------------------------------------------|
| A02BD*   | Combinations for eradication of <i>Helicobacter pylori</i>                                                           |
| A07A*    | Intestinal anti-infective (antibiotics, sulfonamides, imidazole derivatives, other intestinal anti-infective)        |
| A07F*    | Antidiarrheal microorganism                                                                                          |
| G01AA*   | Antibiotics as gynecological anti-infective and antiseptics, exclude combinations with corticosteroids               |
| G01BA*   | Antibiotics and corticosteroids as gynecological anti-infective and antiseptics in combinations with corticosteroids |
| J01*     | Antibacterial for systemic use                                                                                       |
| J04*     | Antimycobacterial for systemic use                                                                                   |
| L01D*    | Cytotoxic antibiotics and related substances as antineoplastic agents                                                |
| R02AB*   | Antibiotics as throat preparations                                                                                   |

Supplementary Table S3. Unadjusted multinomial analysis on the impact of maternal, perinatal, and early life factors on asthma control categories at preschool age.

|                                         | Controlled<br>(ref) n=3728 | Partly<br>controlled<br>(n=2629) | Uncontrolled (n=849)   | LR<br>chi <sup>2</sup> | p-<br>value | Pseudo<br>r <sup>2</sup> |
|-----------------------------------------|----------------------------|----------------------------------|------------------------|------------------------|-------------|--------------------------|
|                                         | Relative risk              | Relative risk<br>(95% CI)        | Relative risk (95% CI) |                        |             |                          |
| Maternal asthma                         | 1                          | 0.86 (0.71, 1.03)                | 1.18 (0.92, 1.51)      | 6.14                   | 0.047       | 0.0004                   |
| Maternal atopy                          | 1                          | 0.86 (0.75, 0.98)                | 0.98 (0.81, 1.18)      | 5.37                   | 0.068       | 0.0004                   |
| Maternal antibiotics during pregnancy   | 1                          | 1.08 (1.03, 1.13)                | 1.06 (0.99, 1.13)      | 12.77                  | 0.002       | 0.0009                   |
| Hypertensive disorders in pregnancy     | 1                          | 1.09 (0.89, 1.35)                | 1.20 (0.89, 1.61)      | 1.64                   | 0.440       | 0.0001                   |
| Gestational diabetes                    | 1                          | 1.00 (0.81, 1.23)                | 1.38 (1.04, 1.81)      | 5.38                   | 0.068       | 0.0004                   |
| Smoking during pregnancy                | 1                          | 1.30 (1.14, 1.48)                | 1.07 (0.88, 1.31)      | 15.32                  | 0.001       | 0.0011                   |
| SES - material                          | 1                          | 1.16 (1.05, 1.28)                | 0.99 (0.85, 1.15)      | 8.82                   | 0.012       | 0.0007                   |
| SES - social                            | 1                          | 1.07 (0.96, 1.18)                | 0.98 (0.83, 1.14)      | 1.97                   | 0.373       | 0.0001                   |
| Mode of delivery, C-section vs vaginal  | 1                          | 1.11 (1.00, 1.23)                | 1.21 (1.03, 1.42)      | 7.14                   | 0.028       | 0.0005                   |
| Maternal age at delivery                |                            |                                  |                        | 8.32                   | 0.081       | 0.0006                   |
| <20 years                               |                            | 1.35 (1.04, 1.77)                | 1.26 (0.85, 1.88)      |                        |             |                          |
| 20-35 years (ref)                       | 1                          |                                  |                        |                        |             |                          |
| >35 years                               |                            | 0.94 (0.82, 1.06)                | 1.09 (0.90, 1.31)      |                        |             |                          |
| Child sex, male vs female               | 1                          | 1.10 (0.99, 1.22)                | 1.22 (1.04, 1.43)      | 7.77                   | 0.021       | 0.0006                   |
| Birthweight, <2500g                     | 1                          | 1.15 (0.97, 1.36)                | 0.98 (0.76, 1.27)      | 3.09                   | 0.213       | 0.0005                   |
| Birthweight percentile category         |                            |                                  |                        |                        |             |                          |
| SGA                                     |                            | 0.92 (0.78, 1.08)                | 0.89 (0.69, 1.14)      | 2.8                    | 0.591       | 0.0002                   |
| AGA (ref)                               | 1                          |                                  |                        |                        |             |                          |
| LGA                                     |                            | 1.00 (0.84, 1.19)                | 1.14 (0.89, 1.46)      |                        |             |                          |
| Season birth                            |                            |                                  |                        |                        |             |                          |
| Spring (Mar – Apr) (ref)                | 1                          |                                  |                        | 9.28                   | 0.159       | 0.0007                   |
| Summer (Jun – Aug)                      |                            | 1.14 (0.99, 1.32)                | 1.18 (0.92, 1.46)      |                        |             |                          |
| Fall (Sep – Nov)                        |                            | 1.04 (0.90, 1.20)                | 1.16 (0.94, 1.43)      |                        |             |                          |
| Winter (Dec – Feb)                      |                            | 1.19 (1.03, 1.37)                | 1.21 (0.97, 1.49)      |                        |             |                          |
| NICU admission                          | 1                          | 1.17 (1.02, 1.36)                | 1.15 (0.93, 1.42)      | 2.27                   | 0.072       | 0.0004                   |
| Jaundice                                | 1                          | 1.11 (0.90, 1.36)                | 1.16 (0.86, 1.57)      | 1.52                   | 0.467       | 0.0001                   |
| Bronchopulmonary dysplasia              | 1                          | 1.60 (0.99, 2.59)                | 2.22 (1.21, 4.06)      | 7.47                   | 0.024       | 0.0005                   |
| Hospitalization for respiratory illness | 1                          | 2.38 (1.95, 2.92)                | 1.73 (1.28, 2.35)      | 73.1                   | <0.001      | 0.0053                   |

|                                         |   |                   |                   |       |        |        |
|-----------------------------------------|---|-------------------|-------------------|-------|--------|--------|
| Antibiotics – child                     | 1 | 1.06 (0.94, 1.20) | 1.29 (1.06, 1.57) | 6.94  | 0.031  | 0.0005 |
| Controller medications before diagnosis | 1 | 0.98 (0.88, 1.08) | 1.60 (1.35, 1.89) | 36.03 | <0.001 | 0.0026 |
| Age at diagnosis (<2.5 years)           | 1 | 1.41 (1.27, 1.56) | 1.00 (0.86, 1.16) | 49.08 | <0.001 | 0.0035 |
| Child atopy                             | 1 | 0.95 (0.86, 1.05) | 1.13 (0.97, 1.32) | 5.21  | 0.074  | 0.0004 |

SES: socioeconomic status. The variables are analysed as yes vs no, unless otherwise specified.

Supplementary Table S4. Adjusted multinomial analysis on the impact of maternal, perinatal, and early life factors on asthma control trajectories at preschool age.

|                                                    | Controlled (ref)<br>n=3728 | Partly controlled<br>(n=2629) | Uncontrolled (n=849)     |
|----------------------------------------------------|----------------------------|-------------------------------|--------------------------|
|                                                    | Relative risk              | Relative risk (95% CI)        | Relative risk (95% CI)   |
| Maternal asthma: yes vs no                         | 1                          | 0.85 (0.71, 1.04)             | 1.17 (0.91, 1.52)        |
| Maternal atopy: yes vs no                          | 1                          | <b>0.85 (0.74, 0.97)</b>      | 0.99 (0.81, 1.20)        |
| Maternal antibiotics in pregnancy: yes vs no       | 1                          | <b>1.19 (1.06, 1.33)</b>      | 1.10 (0.93, 1.30)        |
| Gestational diabetes: yes vs no                    | 1                          | 1.02 (0.82, 1.26)             | <b>1.41 (1.06, 1.87)</b> |
| Smoking in pregnancy: yes vs no                    | 1                          | <b>1.18 (1.02, 1.37)</b>      | 1.07 (0.86, 1.32)        |
| Maternal age at delivery                           |                            |                               |                          |
| <20 years                                          |                            | 1.14 (0.86, 1.51)             | 1.20 (0.79, 1.81)        |
| 20-35 years (reference)                            | 1                          |                               |                          |
| >35 years                                          |                            | 0.99 (0.86, 1.13)             | 1.02 (0.84, 1.24)        |
| Mode of delivery: C-section vs vaginal             | 1                          | <b>1.11 (1.00, 1.25)</b>      | <b>1.18 (1.00, 1.39)</b> |
| Birthweight: under vs over 2500 grams              |                            | 1.04 (0.87, 1.24)             | 0.85 (0.63, 1.13)        |
| Season of birth                                    |                            |                               |                          |
| Spring (reference)                                 | 1                          |                               |                          |
| Summer                                             |                            | <b>1.16 (1.00, 1.34)</b>      | 1.16 (0.93, 1.45)        |
| Fall                                               |                            | 1.02 (0.88, 1.18)             | 1.12 (0.90, 1.40)        |
| Winter                                             |                            | 1.14 (0.99, 1.33)             | 1.22 (0.98, 1.51)        |
| Bronchopulmonary dysplasia: yes vs no              |                            | 1.30 (0.77, 2.20)             | 1.91 (0.92, 3.94)        |
| Child antibiotics before asthma dx: yes vs no      |                            | 1.09 (0.96, 1.24)             | <b>1.32 (1.08, 1.61)</b> |
| Hospitalization for respiratory illness: yes vs no | 1                          | <b>2.24 (1.81, 2.76)</b>      | <b>1.65 (1.19, 2.27)</b> |

The relative risk associated with each exposure and for partly controlled asthma and uncontrolled asthma compared to controlled asthma, adjusted for all other exposures included in model ( $p < 0.1$  in univariate analysis), and covariates (child sex: male vs female, socioeconomic status [material]: low vs high). P-value for model  $< 0.0001$ , LR  $\chi^2$ : 141.13, pseudo  $r^2$ : 0.0107.

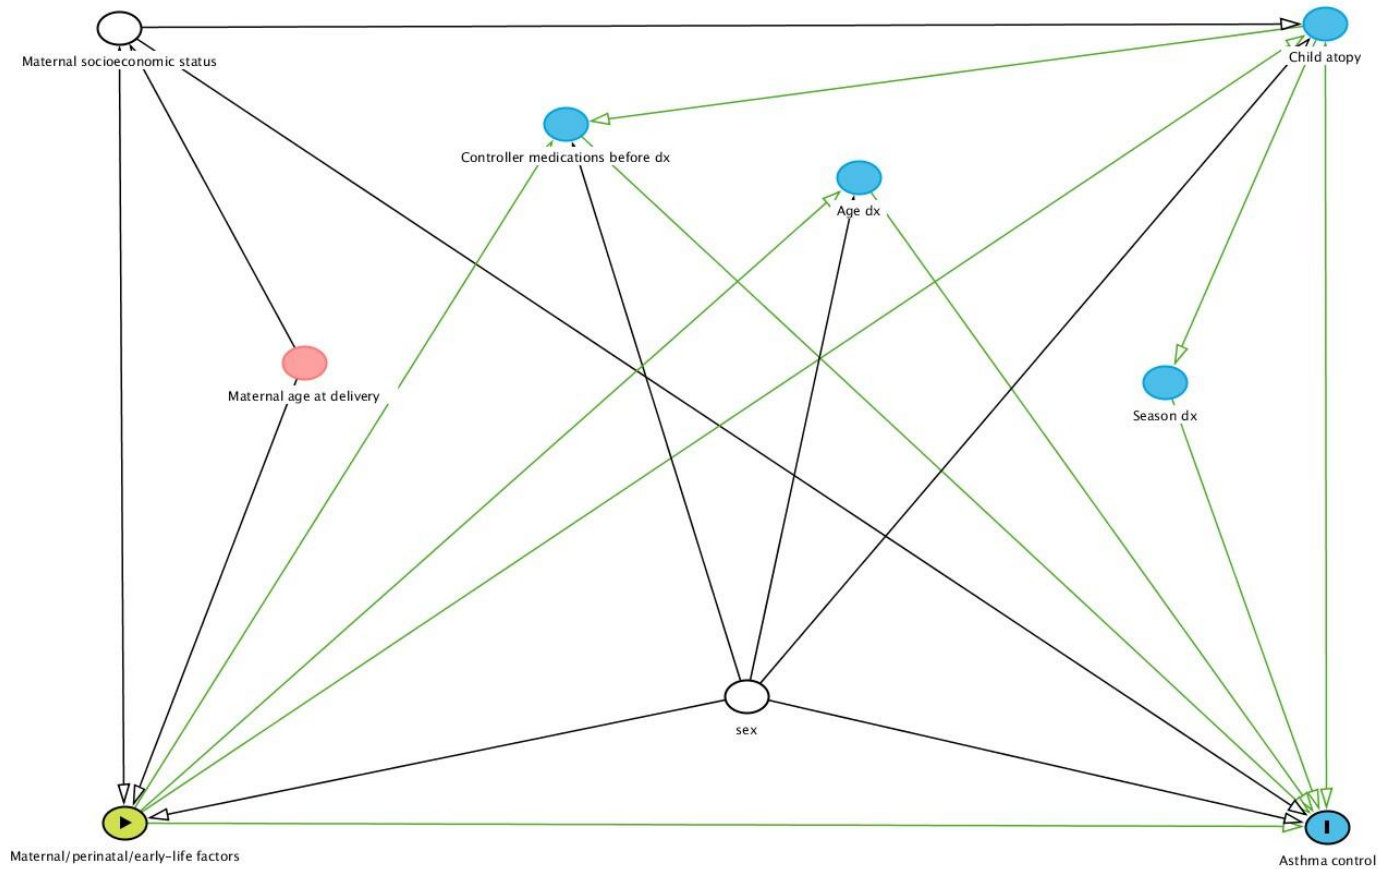

Supplementary figure 1. Directed acyclic graph of relationships between maternal, perinatal, and early-life factors, covariates, and childhood asthma control.
